# Supplementary material
Source: HighWire-hosted journal article supplement (https://bmjopen.bmj.com/content/13/12/e070813)
Supplement: inline-supplementary-material-2 [file inline-supplementary-material-2.pdf]

| Construct                           | PE           | EE           | SI           | FC           | ATT          | BI           | Divergent<br>Validity |
|-------------------------------------|--------------|--------------|--------------|--------------|--------------|--------------|-----------------------|
| Performance<br>Expectancy (PE)      | <b>0.806</b> |              |              |              |              |              | Established           |
| Effort<br>Expectancy (EE)           | 0.143        | <b>0.831</b> |              |              |              |              | Established           |
| Social<br>Influence (SI)            | 0.436        | 0.516        | <b>0.825</b> |              |              |              | Established           |
| Facilitating Condition<br>(FC)      | 0.533        | 0.178        | 0.543        | <b>0.848</b> |              |              | Established           |
| Attitude (ATT)                      | 0.366        | 0.601        | 0.383        | 0.511        | <b>0.781</b> |              | Established           |
| Behavioral<br>Intention to use (BI) | 0.325        | 0.556        | -0.112       | 0.362        | 0.603        | <b>0.800</b> | Established           |
